# Supplementary material for: m-Cresol affects the lipid bilayer in membrane models and living neurons
Source: Royal Society of Chemistry journal article supplement (doi:10.1039/c6ra20337j), 2016-01-01
Supplement: c6ra20337j1.pdf [file c6ra20337j1.pdf]

### Supplementary Information

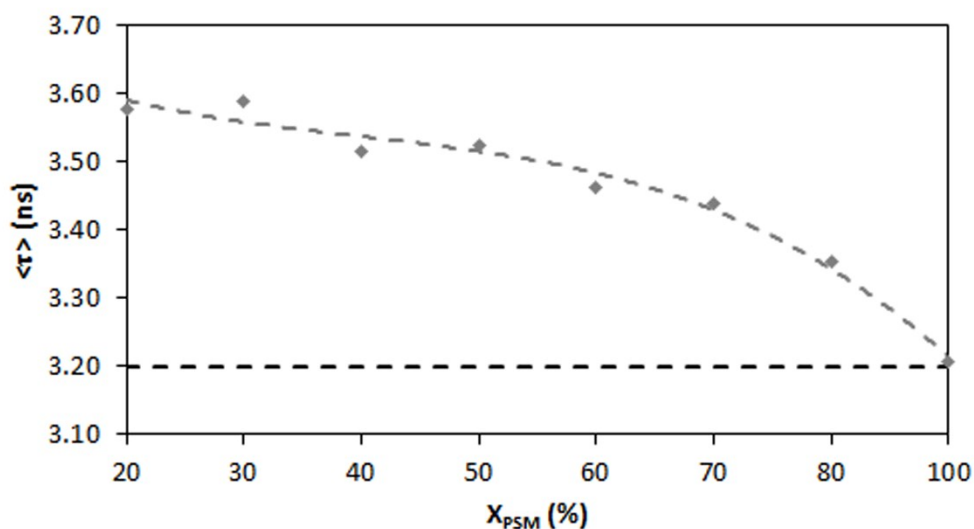

**Figure S1.** Intensity-weighted average fluorescence lifetime of Humulin® containing *m*-cresol 100  $\mu\text{M}$  in the absence (black line) and in presence of LUV (POPC/PSM binary mixtures with molar proportions indicated in Materials and Methods) (gray line). The dotted lines are merely guides for the eye. All experiments were performed at room temperature.

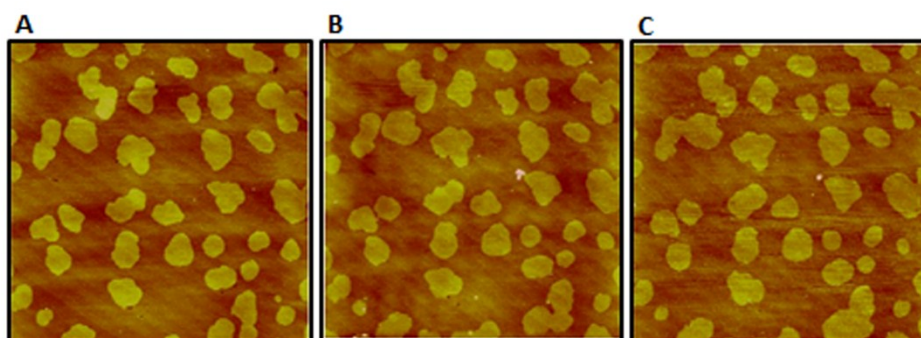

**Figure S2.** AFM topographic images of an SLB composed of DOPC/PSM/Chol (40:40:20 mol:mol:mol) deposited on mica in the beginning of the scanning (A), 1h (B) and 2h (C) after scanning the surface. The images were obtained in a liquid cell at room temperature. The image corresponds to an area of  $20 \times 20 \mu\text{m}^2$ .  $Z = 7\text{nm}$ .

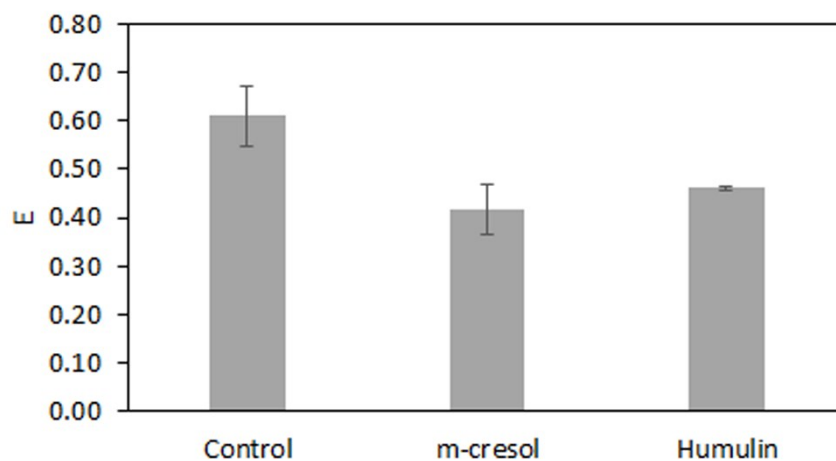

**Figure S3.** Efficiency of FRET between the donor/acceptor pair NBD-DPPE/Rhod-DOPE in the absence and in presence of pure *m*-cresol 30  $\mu$ M and *m*-cresol 1 mM from Humulin®. Measurements were performed in presence of LUV containing POPC/SM/Chol ternary mixtures with molar proportions 48.5/29.3/22.2 at room temperature.

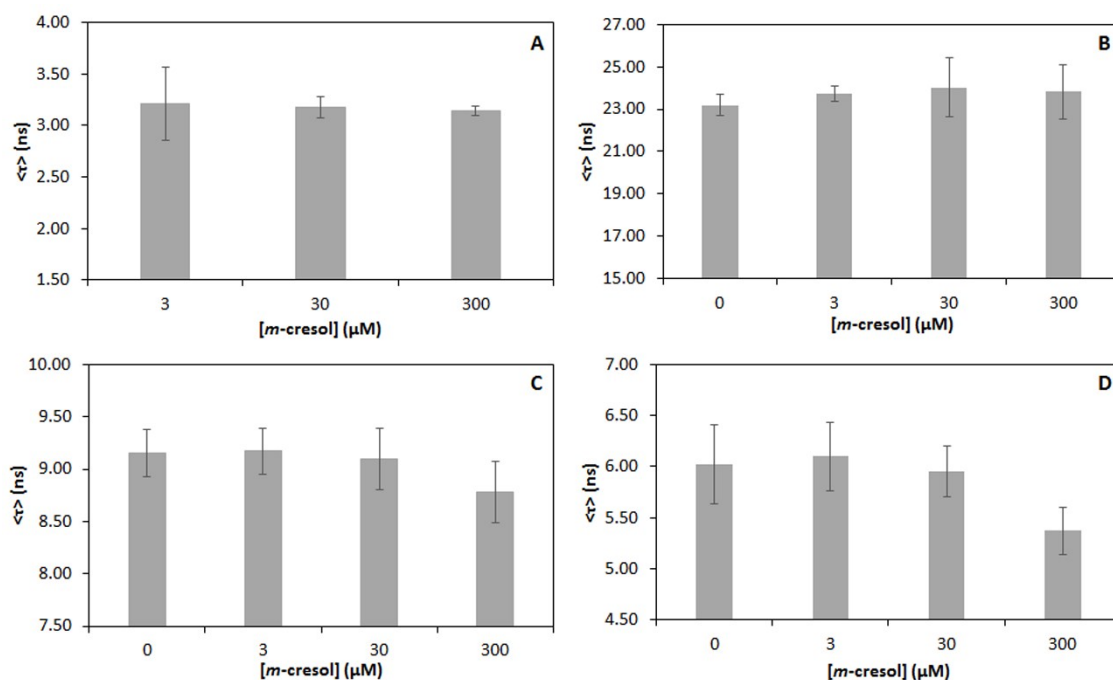

**Figure S4.** Interaction of *m*-cresol with LUV of DOPC/PSM/Chol with molar proportions 40/40/20, corresponding to a  $l_o$  fraction of 40 mol% at room temperature assessed by fluorescence spectroscopy. Intensity-weighted average fluorescence lifetime of *m*-cresol 3  $\mu\text{M}$ , 30  $\mu\text{M}$  and 300  $\mu\text{M}$  (A); *t*-PnA (B), NBD-DPPE (C) and NBD-DOPE (D), in the absence and in the presence of *m*-cresol 3  $\mu\text{M}$ , 30  $\mu\text{M}$  and 300  $\mu\text{M}$ . The intensity-weighted fluorescence lifetimes of *m*-cresol in the presence of LUV are quite similar to those measured in presence of the mixture POPC/PSM/Chol (Figure 4 – B in the main text). Regarding the fluorescent probes, the intensity-weighted fluorescence lifetimes of *t*-PnA remain unchanged, even in presence of *m*-cresol 300  $\mu\text{M}$ , as observed for the lipid system containing POPC (Figure 6 in the main text). The intensity-weighted fluorescence lifetimes of NBD-DPPE and DOPE also follow the same trend in presence in both lipid systems, being almost undetectable for NBD-DPPE (Figure 5 – A), while for NBD-DOPE, a small but significant decrease is detectable for larger *m*-cresol concentrations. Overall, these experiments reinforce our conclusions about the *m*-cresol interaction with lipid bilayer. The comparison was made with the mixture POPC/PSM/Chol (48.5/29.3/22.2 mol/mol/mol) which has 36 mol%  $l_o$  fraction.
